# Supplementary material
Source: HighWire-hosted journal article supplement (https://ard.bmj.com/content/annrheumdis-2021-219845)

## Supplementary Materials

### Supplementary Methods

Propensity scores were calculated for use as weights within the inverse probability weighted Cox proportional hazards models<sup>1</sup>. These propensity scores were estimated separately for treatment cohorts within the 1) all inflammatory joint diseases, and 2) RA cohorts. Note that due to low number of events, and balance not being achieved, between treatment cohort analyses using inverse propensity score weighting was not performed in the other IJD cohort. Propensity scores were also calculated separately when comparing the csDMARD to the b/tsDMARD groups in each of the three inflammatory joint disease cohorts.

Multinomial logistic (for the estimation of propensity scores within the six DMARD cohorts), and logistic regression models (for the estimation of propensity score within the csDMARD/b-tsDMARD cohorts) were fitted. All models contained the same covariates: history of cancer, diabetes, heart failure, ischemic heart disease, hospitalisation listing infection, lung disease, stroke, venous thromboembolic events, kidney failure, and surgery, age, sex, disease duration, DAS28, an indicator variable specifying whether the individual had received a different b/tsDMARD in the 180 days before start of follow-up, the number of previous b/tsDMARDs, days in hospital (both in the previous 10 years, and 1 year), region of domicile, educational level, civil status, and country of birth. See Supplementary Table 4 for definitions and the functional form of each of the covariates included in the propensity score model. The models additionally contained interactions between age and a history of lung disease, a history of lung disease and cancer, and age and region.

Stabilised inverse probability of treatment weights<sup>2</sup> were calculated from the propensity scores predicted from these models and were additionally restricted to be no larger than the 99% and no smaller than the 1% centile of the distribution to further avoid extreme weight. The standardised mean bias<sup>3</sup> was used to determine whether balance had been reached when using stabilized weights; these are presented in Supplementary Tables 6-8. Subsequent Cox proportional hazards models used the robust sandwich estimator to calculate standard errors.

<sup>1</sup>Austin PC. The performance of different propensity score methods for estimating marginal hazard ratios. *Stat. Med* 2012;32(12) 2837-2849. doi: 10.1002/sim.5705

<sup>2</sup>Pezzi A, Cavo M, Biggeri A et al. Inverse probability weighting to estimate causal effect of a singular phase in a multiphase randomized clinical trial for multiple myeloma. *BMC Medical Research Methodology* 2016;16(150). doi: 10.1186/s12874-016-0253-9

<sup>3</sup>Zhang Z, Kim HJ, Lonjon G et al. Balance diagnostics after propensity score matching. *Ann Transl Med* 2019;(1)16. doi:10.21037/atm.2018.12.10

**Supplementary Analysis: Risks in patients on sulfasalazine**

To assess risks for the outcomes under study specifically in patients on sulfasalazine, we have performed additional ad-hoc analyses, contrasting patients with any IJD on sulfasalazine monotherapy (N=4675) to patients on any csDMARD therapy (excluding sulfasalazine monotherapy, but including combination therapies of which sulfasalazine may form a part, N=28621), using the same analytic approach as for the other treatment comparisons.

In this select group of patients, absolute risks for the outcomes were in the same range as the other DMARD cohorts. We noted no increased risk for hospitalization for any cause (HR=1.08, 0.97-1.21, n exposed events: 381), increased point estimates for hospitalization listing COVID-19 (HR=1.52, 95% CI 1.05-2.20, n exposed events: 37), admission to ICU (HR=1.97 (95% CI 0.64-6.11, n exposed events: 4), but no increased risks for death from any cause (HR=0.96, 95% CI 0.70-1.31, n exposed events: 46, and no increased risks of death from COVID-19 (HR=0.97, 95% CI 0.40-2.32, n exposed events: 6).

**Supplementary Table 1.** Data sources included in the study

|                                                                            |                                                                                                                                                                                                                                                                                                                                                                                                                                                                                                                                                         |
|----------------------------------------------------------------------------|---------------------------------------------------------------------------------------------------------------------------------------------------------------------------------------------------------------------------------------------------------------------------------------------------------------------------------------------------------------------------------------------------------------------------------------------------------------------------------------------------------------------------------------------------------|
| <b>Swedish Rheumatology Quality Register (SRQ)</b>                         | A nationwide longitudinal clinically integrated register operated by The Swedish Society for Rheumatology, started in 1996. Patients with RA and other rheumatologic diseases are registered in the SRQ by the treating rheumatologist. SRQ contains information about disease activity and additional information such as treatment and smoking status. SRQ covers 95% of all patients with RA treated with b/tsDMARD s in Sweden.                                                                                                                     |
| <b>Swedish Patient Register (NPR)</b>                                      | A national register maintained by The National Board of Health and Welfare. Hospital discharges from inpatient care and patients visits in non-primary outpatient care, have been registered, since 1964 and 2001 respectively. Diagnoses are coded according to the Swedish version of the International Classification of Disease (ICD). The coverage of the inpatient part is close to 100%, for the outpatient part, the overall coverage is around 80% (higher for public than for private care-providers).                                        |
| <b>Prescribed Drug Register (PDR)</b>                                      | A national register maintained by The National Board of Health and Welfare. It contains information about all drugs dispensed on prescription in Sweden and is linked to the personal identification number since 2005. The coverage is close to 100%.                                                                                                                                                                                                                                                                                                  |
| <b>Swedish Population Register</b>                                         | A national register maintained by Swedish Tax agency. Contains information such as home district, civil status and migration data.                                                                                                                                                                                                                                                                                                                                                                                                                      |
| <b>Longitudinal database for insurance and labor market-studies (LISA)</b> | A national register maintained by Statistics Sweden. It contains information about sick leave, parental leave and employment status in Sweden from 1990                                                                                                                                                                                                                                                                                                                                                                                                 |
| <b>Cause of Death Register</b>                                             | The Cause of Death Register is a national register containing information on date and cause of death (underlying and contributory) for all deceased residents, including deaths among Swedish residents who died abroad. The register was started in 1952, and the data is considered complete since 1961. From that year and onward, cause of death is missing for less than 0.5% of deceased individuals, and in 2002, a validation study estimated that only 3.3% had any errors at the three digit level of the ICD-coded underlying cause of death |
| <b>Swedish Intensive Care Quality Register (SIRS)</b>                      | A national clinical register containing clinical information on patients admitted to intensive care from 2008 onwards. ( <a href="https://www.icuregswe.org/en">https://www.icuregswe.org/en</a> )                                                                                                                                                                                                                                                                                                                                                      |

**Supplementary Table 2:** ICD10 and ATC codes used to define cohorts

| <b>Inflammatory joint disease cohort definitions</b> |                        | <b>DMARD treatment cohort definitions*</b> |                                                                                                            |
|------------------------------------------------------|------------------------|--------------------------------------------|------------------------------------------------------------------------------------------------------------|
| <b>Disease</b>                                       | <b>ICD10 code</b>      | <b>DMARD</b>                               | <b>ATC code</b>                                                                                            |
| Rheumatoid arthritis                                 | M05, M06               | csDMARD                                    | L04AX01, A07EC01, L04AD01, P01BA01, M01CB01, L04AA06, L04AX03, L01AA01, P01BA02, J01AA08, L04AA13, M01CC01 |
| Psoriatic arthritis                                  | M070, M071, M073, L405 | TNFi                                       | L04AB04, L04AB05, L04AB01, L04AB06, L04AB02                                                                |
| Ankylosing spondylitis                               | M45                    | Abatacept                                  | L04AA24                                                                                                    |
| Other spondyloarthropathies                          | M460, M461, M468, M469 | Tocilizumab                                | L04AC07                                                                                                    |
| Juvenile idiopathic arthritis                        | M08, M09               | Rituximab                                  | L01XC02                                                                                                    |
|                                                      |                        | JAKi                                       | L04AA29, L04AA37, L04AA44                                                                                  |

\*As recorded in the Prescribed Drug Register

**Supplementary Table 3.** Characteristics of Swedish residents with chronic inflammatory arthritis in Sweden March 1<sup>st</sup>, 2015-2019 combined and averaged, and their matched general population comparator subjects.

|                                                                 | <b>RA</b>      | <b>Other IJD</b> | <b>All inflammatory joint disease</b> | <b>General population</b> |
|-----------------------------------------------------------------|----------------|------------------|---------------------------------------|---------------------------|
| Average yearly individuals                                      | 52149          | 52127            | 104276                                | 464819                    |
| Average yearly deaths                                           | 808            | 269              | 1077                                  | 2547                      |
| Age, Median (IQR)                                               | 68 (56-76)     | 54 (42-66)       | 61 (48-72)                            | 59 (46-70)                |
| Females                                                         | 72%            | 51%              | 62%                                   | 62%                       |
| Time since diagnosis, median (IQR)                              | 9.0 (4.0-14.0) | 8.0 (4.0-13.0)   | 9.0 (4.0-13.0)                        | -                         |
| Comorbidities                                                   |                |                  |                                       |                           |
| History of cancer                                               | 5%             | 4%               | 4%                                    | 4%                        |
| History of diabetes                                             | 13%            | 10%              | 11%                                   | 9%                        |
| History of heart failure                                        | 4%             | 2%               | 3%                                    | 2%                        |
| History of IHD                                                  | 8%             | 4%               | 6%                                    | 3%                        |
| History of infections                                           | 7%             | 4%               | 5%                                    | 2%                        |
| History of lung diseases                                        | 11%            | 6%               | 9%                                    | 4%                        |
| History of kidney failure                                       | 3%             | 2%               | 3%                                    | 1%                        |
| History of stroke                                               | 4%             | 2%               | 3%                                    | 2%                        |
| History of joint surgery                                        | 19%            | 7%               | 13%                                   | 5%                        |
| History of VTE                                                  | 1.2%           | 0.7%             | 1.0%                                  | 0.5%                      |
| Highest achieved education                                      |                |                  |                                       |                           |
| <9 years                                                        | 18%            | 7%               | 13%                                   | 10%                       |
| 9-12 years                                                      | 55%            | 60%              | 58%                                   | 55%                       |
| 12+ years                                                       | 26%            | 33%              | 30%                                   | 35%                       |
| Civil status: Married                                           | 50%            | 48%              | 49%                                   | 48%                       |
| Born in Sweden (%)                                              | 88%            | 90%              | 89%                                   | 85%                       |
| Hospitalisation days past year, median (IQR)                    | 6 (3-13)       | 4 (2-9)          | 5 (3-11)                              | 4 (2-9)                   |
| Hospitalisation days: 10 years up to 1 year prior, median (IQR) | 4 (0-14)       | 2 (0-7)          | 3 (0-10)                              | 0 (0-5)                   |

**Supplementary Table 4:** Description of covariates included in the propensity score estimation model.

| Variable                           | Description                                                                                                                                                                                                                                                                                                                                                                                                                                                                                                                                                                                                                                                                           |
|------------------------------------|---------------------------------------------------------------------------------------------------------------------------------------------------------------------------------------------------------------------------------------------------------------------------------------------------------------------------------------------------------------------------------------------------------------------------------------------------------------------------------------------------------------------------------------------------------------------------------------------------------------------------------------------------------------------------------------|
| <b>Comorbidity</b>                 |                                                                                                                                                                                                                                                                                                                                                                                                                                                                                                                                                                                                                                                                                       |
| History of cancer                  | History of cancer recorded within 5 years prior to cohort entry. Data retrieved from the Cancer Register. Indicator variable (Y/N). Note that information on cancer diagnoses recorded in the Swedish Cancer Register was only available until December 31 <sup>st</sup> 2018.                                                                                                                                                                                                                                                                                                                                                                                                        |
| History of diabetes                | History of diabetes recorded in the 10 years recorded prior to cohort entry. Defined as a record in the National Patient Register (inpatient and outpatient components, ICD10: E10-E11) or dispensation of treatment (ATC: A10) in the Prescribed Drug Register. Indicator variable (Y/N).                                                                                                                                                                                                                                                                                                                                                                                            |
| History of heart failure           | History of heart failure recorded in the 5 years recorded prior to cohort entry. Defined as record in National Patient Register (inpatient component, ICD10: I50). Indicator variable (Y/N).                                                                                                                                                                                                                                                                                                                                                                                                                                                                                          |
| History of ischemic heart disease. | History of ischemic heart disease recorded in the 5 years recorded prior to cohort entry. Defined as record in National Patient Register (inpatient component, ICD10: I20-I25). Indicator variable (Y/N).                                                                                                                                                                                                                                                                                                                                                                                                                                                                             |
| History of hospitalised infections | History of infections recorded in the 2 years prior to cohort entry. Defined as recorded in National Patient Register (inpatient component, ICD10: A00-B99, D73.3, E06.0, E32.1, G00-G02, G04.2, G05-G07, H00.0, H44.0, H60.0-H60.3, H66-H67, H70, I30.1, I40.0, J00-J22, J32, J34.0, J36, J38.3, J39.0-J39.1, J44.0, J85, J86, K04.4, K04.6, K04.7, K10.2, K11.3, K12.2, K14.0, K57.0, K57.2, K57.4, K57.8, K61, K63.0, K65.0, K65.1, K65.2, K65.9, L00-L08, L30.3, M00-M01, M46.2-M46.5, M60.0, M65.0, M71.0, M71.1, M72.6, M86, N10, N11, N12, N13.6, N15.1, N15.9, N30.0 N30.8, N34.0, N41.2, N43.1, N45.2, N45.3, N45.4, N48.2, N61, N70, N73, N75.1). Indicator variable (Y/N). |
| History of lung disease            | History of lung disease other than infectious pneumonia recorded in the 5 years recorded prior to cohort entry. Defined as record in National Patient Register (inpatient and outpatient components, ICD10: J40-J94). Indicator variable (Y/N).                                                                                                                                                                                                                                                                                                                                                                                                                                       |
| History of kidney failure          | History of kidney failure recorded in the 5 years recorded prior to cohort entry. Defined as record in National Patient Register (inpatient and outpatient components, ICD10:N17-N19). Indicator variable (Y/N).                                                                                                                                                                                                                                                                                                                                                                                                                                                                      |
| History of stroke                  | History of stroke recorded in the 5 years recorded prior to cohort entry. Defined as record in National Patient Register (inpatient and outpatient components, ICD10:I50-I69).                                                                                                                                                                                                                                                                                                                                                                                                                                                                                                        |

|                                         |                                                                                                                                                                                                                                                                                                                                                                                      |
|-----------------------------------------|--------------------------------------------------------------------------------------------------------------------------------------------------------------------------------------------------------------------------------------------------------------------------------------------------------------------------------------------------------------------------------------|
|                                         | Indicator variable (Y/N).                                                                                                                                                                                                                                                                                                                                                            |
| History of joint surgery                | History of joint surgery recorded in the 10 years prior to cohort entry. Defined as record in National Patient Register (inpatient and outpatient components, operational codes: NGB, NFB, NBB, NHB, NHC, NHE, NHF, NHG, 8423, 8424, 8426, 8419, 8437, 8436, 8420, 8421, 8422, 8400-8415).<br>Indicator variable (Y/N).                                                              |
| History of venous thrombotic event      | History of VTE recorded in the 5 years recorded prior to cohort entry. Defined as record in National Patient Register (inpatient component, ICD10:I82, I26).<br>Indicator variable (Y/N).                                                                                                                                                                                            |
| <b>Health-care resource utilisation</b> |                                                                                                                                                                                                                                                                                                                                                                                      |
| Hospital days in the previous year      | The number of days spent in hospital during the 365 days prior to cohort entry. Data obtained from the inpatient component of the National Patient Register.<br>Categorised into 0, 1-3, and 4+ days.                                                                                                                                                                                |
| Hospital days in the previous 10 years  | The number of days spent in hospital during the period 10 years to 365 days prior to cohort entry. Data obtained from the inpatient component of the National Patient Register. Categorised into 0, 1-6, and 7+ days.                                                                                                                                                                |
| <b>Socioeconomics</b>                   |                                                                                                                                                                                                                                                                                                                                                                                      |
| Education                               | Highest education achieved as recorded in the year prior to cohort entry. Data obtained from the Longitudinal integrated database for health insurance and labour market studies (LISA). Note that education information was only available to 2018 in LISA so the value in 2018 was assumed for any subsequent years. Categorised into:<br>1= <9 years<br>2=9-12years<br>3=12years+ |
| Civil status                            | Civil status recorded in the year prior to cohort entry. Data obtained from LISA, Note that civil status information was only available to 2017 in LISA so the value in 2017 was assumed for any subsequent years. Categorised into married/partner, or single.                                                                                                                      |
| Country of birth                        | Country of birth obtained from the Total Population Register categorised as Sweden, rest of Europe, and rest of world.                                                                                                                                                                                                                                                               |
| <b>Disease-related</b>                  |                                                                                                                                                                                                                                                                                                                                                                                      |
| DAS28                                   | DAS28 value (ESR) from most recent rheumatology visit recorded in the SRQ within one year prior to start of follow-up. Categorised into remission (<2.6), low (2.6-3.1), moderate (3.2- 5.1), high (5.2+), and missing.                                                                                                                                                              |
| Disease duration                        | Disease duration in years, taken as the difference between the diagnosis date (defined using the disease selection definition and data in the National Patient register) and entry to cohort.<br>Categorised as <2, 2-4, 5-9, 10+ years.                                                                                                                                             |

| <b>Treatment-related</b>                    |                                                                                                                                                                                                                                                                                                                                                                        |
|---------------------------------------------|------------------------------------------------------------------------------------------------------------------------------------------------------------------------------------------------------------------------------------------------------------------------------------------------------------------------------------------------------------------------|
| Number of previous b/tsDMARDs               | Number of previous b/tsDMARDs prior to the treatment that caused entry to cohort. Identified by combining the PDR and SRQ. Categorised as 0, 1-2, 3+.                                                                                                                                                                                                                  |
| b/tsDMARD recorded in the previous 180 days | Identifies if a different b/tsDMARD was recorded in the previous 180 days prior to start. Indicator variable (Y/N).                                                                                                                                                                                                                                                    |
| Concomitant steroid use*                    | Dispensation of steroids (ATC: H02AB06) recorded in the Prescribed Drug Register in the 90 days prior to cohort entry.                                                                                                                                                                                                                                                 |
| Concomitant csDMARD use*                    | Concomitant csDMARD use defined as dispensation of csDMARD recorded in the Prescribed Drug Register within the 120 days prior to cohort entry where the dispensation occurs after the order date of the treatment defining the exposure cohort (ATC codes: L04AX01, A07EC01, L04AD01, P01BA01, M01CB01, L04AA06, L04AX03, L01AA01, P01BA02, J01AA08, L04AA13, M01CC01) |

\*Variables included in weighted Cox model not propensity score estimation model



**Supplementary Table 5.** Characteristics of Swedish residents with chronic inflammatory joint diseases (RA, PsA, AS, SpA and JIA) according to their DMARD treatment status on March 1<sup>st</sup> 2020.

|                                                              | <b>csDMARD*</b> | <b>TNFi</b>    | <b>Abatacept</b> | <b>Tocilizumab</b> | <b>Rituximab</b> | <b>JAKi</b>     | <b>All b/tsDMARDs combined</b> |
|--------------------------------------------------------------|-----------------|----------------|------------------|--------------------|------------------|-----------------|--------------------------------|
| Individuals                                                  | 33296           | 22070          | 1324             | 1037               | 2180             | 1725            | 28336                          |
| Age at entry, median (IQR)                                   | 67 (55-75)      | 54 (42-66)     | 65 (54-73)       | 62 (50-72)         | 68 (58-75)       | 60 (49-69)      | 57 (44-68)                     |
| Female                                                       | 65%             | 58%            | 79%              | 79%                | 77%              | 79%             | 62%                            |
| Time since diagnosis, median (IQR)                           | 8.9 (4.5-14.7)  | 9.6 (4.8-15.5) | 12.1 (6.4-17.6)  | 11.8 (6.8-17.4)    | 13.8 (8.9-18.2)  | 11.0 (5.7-16.9) | 10.3 (5.3-16.1)                |
| DAS28ESR at most recent visit during last 12 months (if any) |                 |                |                  |                    |                  |                 |                                |
| Median (IQR)                                                 | 2.6 (1.9-3.4)   | 2.4 (1.7-3.3)  | 3.1 (2.4-4.3)    | 1.8 (1.1-3.2)      | 2.9 (2.1-3.9)    | 3.3 (2.5-4.4)   | 2.5 (1.8-3.6)                  |
| Remission                                                    | 52%             | 56%            | 32%              | 65%                | 43%              | 30%             | 52%                            |
| Low                                                          | 19%             | 16%            | 21%              | 10%                | 18%              | 15%             | 16%                            |
| Moderate                                                     | 26%             | 24%            | 36%              | 17%                | 31%              | 40%             | 27%                            |
| High                                                         | 4%              | 4%             | 10%              | 8%                 | 8%               | 15%             | 6%                             |
| No visit with complete DAS28 data                            | 76%             | 66%            | 56%              | 59%                | 49%              | 54%             | 63%                            |
| N previous b/tsDMARDs (median) (IQR)                         | 0.0 (0.0-0.0)   | 0.0 (0.0-1.0)  | 1.0 (1.0-2.0)    | 1.0 (0.0-2.0)      | 1.0 (0.0-2.0)    | 2.0 (1.0-3.0)   | 0.0 (0.0-1.0)                  |
| On other bDMARD in past 180 days (%)                         | 1%              | 5%             | 16%              | 16%                | 10%              | 16%             | 7%                             |
| Concomitant therapies                                        |                 |                |                  |                    |                  |                 |                                |
| csDMARDs                                                     | 100%            | 37%            | 42%              | 31%                | 37%              | 31%             | 37%                            |
| Steroids                                                     | 22%             | 14%            | 37%              | 33%                | 31%              | 34%             | 19%                            |
| Comorbidities                                                |                 |                |                  |                    |                  |                 |                                |

|                                                                               |                |               |                |                |                |                |               |
|-------------------------------------------------------------------------------|----------------|---------------|----------------|----------------|----------------|----------------|---------------|
| History of cancer                                                             | 4%             | 1%            | 2%             | 1%             | 5%             | 2%             | 2%            |
| History of diabetes                                                           | 14%            | 9%            | 15%            | 11%            | 15%            | 12%            | 10%           |
| History of heart failure                                                      | 4%             | 1%            | 4%             | 2%             | 4%             | 2%             | 2%            |
| History of IHD                                                                | 6%             | 3%            | 7%             | 3%             | 8%             | 5%             | 4%            |
| History of infections                                                         | 6%             | 3%            | 9%             | 5%             | 10%            | 8%             | 4%            |
| History of lung diseases                                                      | 9%             | 6%            | 16%            | 10%            | 17%            | 11%            | 8%            |
| History of kidney failure                                                     | 3%             | 2%            | 3%             | 3%             | 3%             | 2%             | 2%            |
| History of stroke                                                             | 4%             | 2%            | 3%             | 2%             | 3%             | 2%             | 2%            |
| History of joint surgery                                                      | 14%            | 12%           | 25%            | 24%            | 26%            | 22%            | 15%           |
| History of VTE                                                                | 1%             | 1%            | 1%             | 1%             | 2%             | 1%             | 1%            |
| Highest achieved education                                                    |                |               |                |                |                |                |               |
| <9 years                                                                      | 14%            | 5%            | 11%            | 8%             | 11%            | 7%             | 6%            |
| 9-12 years                                                                    | 59%            | 59%           | 58%            | 60%            | 60%            | 59%            | 59%           |
| 12+ years                                                                     | 27%            | 36%           | 31%            | 32%            | 29%            | 33%            | 35%           |
| Civil status, married                                                         | 51%            | 49%           | 52%            | 49%            | 50%            | 49%            | 49%           |
| Born in Sweden                                                                | 89%            | 88%           | 88%            | 88%            | 84%            | 86%            | 88%           |
| N hospitalisation days in past 365 days**, median (IQR)                       | 5.0 (3.0-11.0) | 4.0 (2.0-7.0) | 5.0 (3.0-12.0) | 4.0 (3.0-7.0)  | 5.0 (3.0-11.0) | 5.0 (3.0-12.0) | 4.0 (2.0-8.0) |
| N hospitalisation days the 10 years prior, up to 1 year prior**, median (IQR) | 2.0 (0.0-9.0)  | 2.0 (0.0-6.0) | 5.0 (0.0-14.0) | 4.0 (0.0-12.0) | 6.0 (1.0-18.0) | 4.0 (0.0-13.0) | 2.0 (0.0-8.0) |

\*Defined as methotrexate, sulfasalazine, anti-malarials, and leflunomide. \*\* of those with a hospitalisation

**Supplementary Table 6.** Characteristics of Swedish residents with chronic inflammatory joint diseases (RA only) according to their DMARD treatment status on March 1<sup>st</sup> 2020.

|                                                              | csDMARD*       | TNFi            | Abatacept       | Tocilizumab     | Rituximab       | JAKi            | All b/tsDMARDs combined |
|--------------------------------------------------------------|----------------|-----------------|-----------------|-----------------|-----------------|-----------------|-------------------------|
| Individuals                                                  | 22904          | 10463           | 1221            | 942             | 2150            | 1384            | 16160                   |
| Age at entry (median), IQR                                   | 70 (60-77)     | 62 (51-71)      | 66 (56-74)      | 63 (53-72)      | 68 (58-75)      | 62 (52-71)      | 64 (52-72)              |
| Female                                                       | 71%            | 75%             | 80%             | 79%             | 77%             | 81%             | 76%                     |
| Time since diagnosis, median (IQR)                           | 8.9 (4.4-14.8) | 11.1 (5.9-16.7) | 12.2 (6.6-17.7) | 12.0 (6.9-17.5) | 13.8 (9.0-18.3) | 11.7 (6.2-17.4) | 11.6 (6.4-17.1)         |
| DAS28ESR at most recent visit during last 12 months (if any) |                |                 |                 |                 |                 |                 |                         |
| Median (IQR)                                                 | 2.6 (1.9-3.4)  | 2.6 (1.9-3.6)   | 3.0 (2.4-4.3)   | 1.9 (1.1-3.3)   | 2.9 (2.1-3.9)   | 3.3 (2.5-4.4)   | 2.7 (2.0-3.8)           |
| Remission                                                    | 51%            | 49%             | 33%             | 64%             | 43%             | 31%             | 46%                     |
| Low                                                          | 19%            | 17%             | 21%             | 10%             | 18%             | 15%             | 17%                     |
| Moderate                                                     | 26%            | 29%             | 36%             | 17%             | 32%             | 40%             | 30%                     |
| High                                                         | 4%             | 5%              | 11%             | 9%              | 8%              | 14%             | 7%                      |
| No. visit with complete DAS28 data                           | 72%            | 59%             | 56%             | 58%             | 49%             | 53%             | 57%                     |
| N previous b/tsDMARDs (median) (IQR)                         | 0.0 (0.0-0.0)  | 0.0 (0.0-1.0)   | 1.0 (0.0-2.0)   | 1.0 (0.0-2.0)   | 1.0 (0.0-2.0)   | 2.0 (1.0-3.0)   | 0.0 (0.0-1.0)           |
| On other bDMARD in past 180 days (%)                         | 1%             | 5%              | 16%             | 16%             | 10%             | 16%             | 8%                      |
| Concomitant therapies                                        |                |                 |                 |                 |                 |                 |                         |
| csDMARDs                                                     | 100%           | 51%             | 43%             | 31%             | 37%             | 32%             | 46%                     |
| Steroids                                                     | 26%            | 21%             | 38%             | 33%             | 31%             | 36%             | 26%                     |
| Comorbidities                                                |                |                 |                 |                 |                 |                 |                         |

|                                                                               |                |               |                |                |                |                |                |
|-------------------------------------------------------------------------------|----------------|---------------|----------------|----------------|----------------|----------------|----------------|
| History of cancer                                                             | 5%             | 1%            | 2%             | 1%             | 5%             | 2%             | 2%             |
| History of diabetes                                                           | 14%            | 10%           | 15%            | 11%            | 15%            | 12%            | 11%            |
| History of heart failure                                                      | 4%             | 2%            | 4%             | 2%             | 4%             | 2%             | 2%             |
| History of IHD                                                                | 7%             | 4%            | 8%             | 3%             | 8%             | 5%             | 5%             |
| History of infections                                                         | 6%             | 4%            | 9%             | 5%             | 10%            | 8%             | 6%             |
| History of lung diseases                                                      | 11%            | 7%            | 17%            | 10%            | 17%            | 12%            | 10%            |
| History of kidney failure                                                     | 3%             | 2%            | 3%             | 3%             | 3%             | 2%             | 2%             |
| History of stroke                                                             | 4%             | 2%            | 4%             | 2%             | 4%             | 2%             | 2%             |
| History of joint surgery                                                      | 16%            | 19%           | 25%            | 24%            | 26%            | 25%            | 21%            |
| History of VTE                                                                | 1%             | 1%            | 1%             | 1%             | 2%             | 2%             | 1%             |
| Highest achieved education                                                    |                |               |                |                |                |                |                |
| <9 years                                                                      | 18%            | 9%            | 11%            | 8%             | 11%            | 8%             | 9%             |
| 9-12 years                                                                    | 57%            | 57%           | 58%            | 60%            | 60%            | 59%            | 57%            |
| 12+ years                                                                     | 26%            | 35%           | 31%            | 32%            | 29%            | 33%            | 33%            |
| Civil status, married                                                         | 51%            | 52%           | 53%            | 52%            | 50%            | 50%            | 52%            |
| Born in Sweden                                                                | 88%            | 87%           | 88%            | 87%            | 84%            | 85%            | 87%            |
| N hospitalisation days in past 365 days**, median (IQR)                       | 5.0 (3.0-11.0) | 4.0 (2.0-8.0) | 5.0 (3.0-12.0) | 4.0 (3.0-7.0)  | 5.0 (3.0-11.0) | 5.0 (3.0-11.0) | 5.0 (3.0-9.0)  |
| N hospitalisation days the 10 years prior, up to 1 year prior**, median (IQR) | 3.0 (0.0-10.0) | 2.0 (0.0-7.0) | 5.0 (0.0-15.0) | 4.0 (0.0-12.0) | 6.0 (1.0-18.0) | 4.0 (0.0-13.0) | 3.0 (0.0-10.0) |

\*Defined as methotrexate, sulfasalazine, anti-malarials, and leflunomide. \*\* of those with a hospitalization

**Supplementary Table 7.** Characteristics of Swedish residents with chronic inflammatory joint diseases (PsA, AS, SpA and JIA only) according to their DMARD treatment status on March 1<sup>st</sup> 2020.

|                                                              | csDMARD*       | TNFi           | Abatacept      | Tocilizumab    | Rituximab       | JAKi           | All b/tsDMARDs combined |
|--------------------------------------------------------------|----------------|----------------|----------------|----------------|-----------------|----------------|-------------------------|
| Individuals                                                  | 10392          | 11607          | 103            | 95             | 30              | 341            | 12176                   |
| Age at entry (median), IQR                                   | 59 (47-69)     | 48 (37-58)     | 47 (29-58)     | 30 (24-56)     | 47 (27-62)      | 51 (37-60)     | 48 (36-58)              |
| Female                                                       | 51%            | 43%            | 71%            | 78%            | 80%             | 70%            | 44%                     |
| Time since diagnosis, median (IQR)                           | 8.9 (4.7-14.4) | 8.4 (4.1-14.1) | 9.3 (4.6-15.5) | 9.2 (5.6-16.8) | 10.2 (6.2-15.1) | 8.1 (4.3-14.7) | 8.4 (4.1-14.1)          |
| DAS28ESR at most recent visit during last 12 months (if any) |                |                |                |                |                 |                |                         |
| Median (IQR)                                                 | 2.5 (1.8-3.3)  | 2.1 (1.5-3.0)  | 3.2 (2.5-4.1)  | 1.0 (0.8-2.2)  | 4.8 (2.2-5.3)   | 3.4 (2.6-4.8)  | 2.2 (1.5-3.1)           |
| Remission                                                    | 54%            | 66%            | 28%            | 83%            | 33%             | 28%            | 64%                     |
| Low                                                          | 19%            | 14%            | 21%            | 3%             | 11%             | 15%            | 14%                     |
| Moderate                                                     | 25%            | 18%            | 46%            | 14%            | 22%             | 39%            | 20%                     |
| High                                                         | 3%             | 3%             | 5%             | 0%             | 33%             | 18%            | 3%                      |
| No visit with complete DAS28 data                            | 84%            | 72%            | 62%            | 69%            | 70%             | 57%            | 71%                     |
| N previous b/tsDMARDs (median) (IQR)                         | 0.0 (0.0-0.0)  | 0.0 (0.0-1.0)  | 2.0 (1.0-3.0)  | 2.0 (1.0-3.0)  | 1.0 (1.0-3.0)   | 2.0 (1.0-3.0)  | 0.0 (0.0-1.0)           |
| On other bDMARD in past 180 days (%)                         | 1%             | 5%             | 22%            | 15%            | 23%             | 15%            | 6%                      |
| Concomitant therapies                                        |                |                |                |                |                 |                |                         |
| csDMARDs                                                     | 100%           | 25%            | 26%            | 22%            | 23%             | 28%            | 25%                     |
| Steroids                                                     | 11%            | 8%             | 27%            | 28%            | 23%             | 30%            | 9%                      |
| Comorbidities                                                |                |                |                |                |                 |                |                         |

|                                                                               |               |               |               |                |                 |                |               |
|-------------------------------------------------------------------------------|---------------|---------------|---------------|----------------|-----------------|----------------|---------------|
| History of cancer                                                             | 3%            | 1%            | 0%            | 1%             | 3%              | 2%             | 1%            |
| History of diabetes                                                           | 13%           | 8%            | 8%            | 5%             | 13%             | 13%            | 9%            |
| History of heart failure                                                      | 2%            | 1%            | 1%            | 0%             | 3%              | 1%             | 1%            |
| History of IHD                                                                | 5%            | 2%            | 4%            | 1%             | 3%              | 3%             | 2%            |
| History of infections                                                         | 4%            | 2%            | 5%            | 3%             | 7%              | 9%             | 3%            |
| History of lung diseases                                                      | 6%            | 4%            | 13%           | 7%             | 20%             | 6%             | 5%            |
| History of kidney failure                                                     | 2%            | 2%            | 4%            | 2%             | 3%              | 2%             | 2%            |
| History of stroke                                                             | 2%            | 1%            | 2%            | 0%             | 0%              | 1%             | 1%            |
| History of joint surgery                                                      | 10%           | 6%            | 17%           | 21%            | 13%             | 11%            | 7%            |
| History of VTE                                                                | 1%            | 0%            | 0%            | 2%             | 3%              | 1%             | 0%            |
| Highest achieved education                                                    |               |               |               |                |                 |                |               |
| <9 years                                                                      | 7%            | 2%            | 6%            | 3%             |                 | 3%             | 3%            |
| 9-12 years                                                                    | 63%           | 61%           | 66%           | 58%            | 70%             | 63%            | 61%           |
| 12+ years                                                                     | 31%           | 37%           | 28%           | 39%            | 30%             | 34%            | 37%           |
| Civil status, married                                                         | 51%           | 46%           | 39%           | 24%            | 43%             | 45%            | 45%           |
| Born in Sweden                                                                | 92%           | 89%           | 92%           | 94%            | 90%             | 93%            | 89%           |
| N hospitalisation days in past 365 days**, median (IQR)                       | 4.0 (2.0-8.0) | 3.0 (2.0-6.0) | 2.0 (2.0-6.0) | 5.0 (3.0-6.0)  | 10.0 (2.0-46.0) | 4.0 (3.0-19.0) | 3.0 (2.0-6.0) |
| N hospitalisation days the 10 years prior, up to 1 year prior**, median (IQR) | 2.0 (0.0-7.0) | 0.0 (0.0-5.0) | 4.0 (0.0-9.0) | 5.0 (2.0-13.0) | 5.0 (2.0-11.0)  | 4.0 (0.0-11.0) | 0.0 (0.0-5.0) |

\*Defined as methotrexate, sulfasalazine, anti-malarials, and leflunomide. \*\* of those with a hospitalisation

**Supplementary Table 8:** Standardised mean differences from propensity score weighting for all variables included in the csDMARD vs. b/tsDMARD analyses.

|                          | All inflammatory diseases |          |            |          | RA         |          |            |          | Other IJD  |          |            |          |
|--------------------------|---------------------------|----------|------------|----------|------------|----------|------------|----------|------------|----------|------------|----------|
|                          | csDMARD                   |          | b/tsDMARD  |          | csDMARD    |          | b/tsDMARD  |          | csDMARD    |          | b/tsDMARD  |          |
|                          | Unweighted                | Weighted | Unweighted | Weighted | Unweighted | Weighted | Unweighted | Weighted | Unweighted | Weighted | Unweighted | Weighted |
| Age                      |                           |          |            |          |            |          |            |          |            |          |            |          |
| <55                      | -0.453                    | -0.045   | 0.453      | 0.045    | -0.312     | -0.035   | 0.312      | 0.035    | -0.528     | -0.046   | 0.528      | 0.046    |
| 55-64                    | -0.052                    | 0.000    | 0.052      | 0.000    | -0.143     | -0.009   | 0.143      | 0.009    | 0.108      | 0.012    | -0.108     | -0.012   |
| 65-69                    | 0.061                     | 0.001    | -0.061     | -0.001   | -0.026     | -0.005   | 0.026      | 0.005    | 0.191      | 0.013    | -0.191     | -0.013   |
| 70-74                    | 0.152                     | 0.008    | -0.152     | -0.008   | 0.065      | 0.001    | -0.065     | -0.001   | 0.267      | 0.013    | -0.267     | -0.013   |
| 75-79                    | 0.202                     | 0.011    | -0.202     | -0.011   | 0.148      | 0.007    | -0.148     | -0.007   | 0.249      | 0.014    | -0.249     | -0.014   |
| 80-84                    | 0.229                     | 0.022    | -0.229     | -0.022   | 0.213      | 0.019    | -0.213     | -0.019   | 0.208      | 0.033    | -0.208     | -0.033   |
| 85+                      | 0.252                     | 0.050    | -0.252     | -0.050   | 0.268      | 0.052    | -0.268     | -0.052   | 0.144      | 0.037    | -0.144     | -0.037   |
| bDMARD previous 180 days | -0.344                    | -0.069   | 0.344      | 0.069    | -0.399     | -0.083   | 0.399      | 0.083    | -0.267     | -0.048   | 0.267      | 0.048    |
| Civil status             | -0.039                    | 0.001    | 0.039      | -0.001   | 0.017      | 0.012    | -0.017     | -0.012   | -0.114     | -0.015   | 0.114      | 0.015    |
| Country of birth         |                           |          |            |          |            |          |            |          |            |          |            |          |
| Sweden                   | 0.043                     | 0.007    | -0.043     | -0.007   | 0.031      | -0.002   | -0.031     | 0.002    | 0.094      | 0.034    | -0.094     | -0.034   |
| Europe                   | 0.000                     | 0.003    | 0.000      | -0.003   | -0.012     | 0.001    | 0.012      | -0.001   | -0.009     | -0.003   | 0.009      | 0.003    |
| Rest of world            | -0.067                    | -0.015   | 0.067      | 0.015    | -0.035     | 0.003    | 0.035      | -0.003   | -0.132     | -0.048   | 0.132      | 0.048    |
| DAS28                    |                           |          |            |          |            |          |            |          |            |          |            |          |
| Remission                | -0.178                    | -0.021   | 0.178      | 0.021    | -0.143     | -0.021   | 0.143      | 0.021    | -0.276     | -0.021   | 0.276      | 0.021    |
| Low                      | -0.055                    | -0.006   | 0.055      | 0.006    | -0.084     | -0.012   | 0.084      | 0.012    | -0.042     | 0.003    | 0.042      | -0.003   |
| Moderate                 | -0.132                    | -0.001   | 0.132      | 0.001    | -0.193     | -0.012   | 0.193      | 0.012    | -0.074     | 0.017    | 0.074      | -0.017   |
| High                     | -0.095                    | 0.001    | 0.095      | -0.001   | -0.132     | -0.007   | 0.132      | 0.007    | -0.055     | 0.006    | 0.055      | -0.006   |
| Missing                  | 0.270                     | 0.019    | -0.270     | -0.019   | 0.312      | 0.032    | -0.312     | -0.032   | 0.294      | 0.006    | -0.294     | -0.006   |

|                               |        |        |        |        |        |        |        |        |        |        |        |        |
|-------------------------------|--------|--------|--------|--------|--------|--------|--------|--------|--------|--------|--------|--------|
| Disease duration              |        |        |        |        |        |        |        |        |        |        |        |        |
| <2 years                      | 0.051  | -0.022 | -0.051 | 0.022  | 0.141  | -0.017 | -0.141 | 0.017  | -0.073 | -0.020 | 0.073  | 0.020  |
| 2-4 years                     | 0.078  | 0.000  | -0.078 | 0.000  | 0.154  | 0.011  | -0.154 | -0.011 | -0.019 | -0.015 | 0.019  | 0.015  |
| 5-9 years                     | 0.043  | 0.005  | -0.043 | -0.005 | 0.069  | 0.005  | -0.069 | -0.005 | 0.023  | 0.004  | -0.023 | -0.004 |
| 10+ years                     | -0.126 | 0.009  | 0.126  | -0.009 | -0.252 | -0.002 | 0.252  | 0.002  | 0.039  | 0.020  | -0.039 | -0.020 |
| Education                     |        |        |        |        |        |        |        |        |        |        |        |        |
| <9 years                      | 0.253  | 0.025  | -0.253 | -0.025 | 0.239  | 0.029  | -0.239 | -0.029 | 0.201  | 0.022  | -0.201 | -0.022 |
| 9-12 years                    | -0.009 | 0.000  | 0.009  | 0.000  | -0.015 | -0.005 | 0.015  | 0.005  | 0.032  | 0.002  | -0.032 | -0.002 |
| 12+ years                     | -0.159 | -0.017 | 0.159  | 0.017  | -0.167 | -0.016 | 0.167  | 0.016  | -0.120 | -0.012 | 0.120  | 0.012  |
| Female                        | 0.045  | -0.002 | -0.045 | 0.002  | -0.120 | -0.008 | 0.120  | 0.008  | 0.138  | 0.000  | -0.138 | 0.000  |
| Hospital days (prev 10 years) |        |        |        |        |        |        |        |        |        |        |        |        |
| 0                             | -0.023 | -0.016 | 0.023  | 0.016  | 0.050  | -0.007 | -0.050 | 0.007  | -0.080 | -0.024 | 0.080  | 0.024  |
| 1-6                           | -0.047 | -0.001 | 0.047  | 0.001  | -0.066 | -0.008 | 0.066  | 0.008  | -0.011 | 0.009  | 0.011  | -0.009 |
| 7+                            | 0.071  | 0.019  | -0.071 | -0.019 | 0.011  | 0.015  | -0.011 | -0.015 | 0.108  | 0.018  | -0.108 | -0.018 |
| Hospital days (previous year) |        |        |        |        |        |        |        |        |        |        |        |        |
| 0                             | -0.080 | -0.008 | 0.080  | 0.008  | -0.054 | -0.004 | 0.054  | 0.004  | -0.077 | -0.008 | 0.077  | 0.008  |
| 1-3                           | 0.009  | -0.001 | -0.009 | 0.001  | -0.001 | -0.006 | 0.001  | 0.006  | 0.012  | 0.004  | -0.012 | -0.004 |
| 4+                            | 0.092  | 0.011  | -0.092 | -0.011 | 0.066  | 0.010  | -0.066 | -0.010 | 0.091  | 0.006  | -0.091 | -0.006 |
| Comorbidities                 |        |        |        |        |        |        |        |        |        |        |        |        |
| Cancer                        | 0.164  | 0.017  | -0.164 | -0.017 | 0.150  | 0.015  | -0.150 | -0.015 | 0.174  | 0.021  | -0.174 | -0.021 |
| Diabetes                      | 0.109  | 0.015  | -0.109 | -0.015 | 0.077  | 0.012  | -0.077 | -0.012 | 0.150  | 0.021  | -0.150 | -0.021 |
| Heart failure                 | 0.126  | 0.022  | -0.126 | -0.022 | 0.108  | 0.022  | -0.108 | -0.022 | 0.132  | 0.017  | -0.132 | -0.017 |
| IHD                           | 0.116  | 0.012  | -0.116 | -0.012 | 0.091  | 0.009  | -0.091 | -0.009 | 0.135  | 0.014  | -0.135 | -0.014 |



|                      |        |        |        |        |        |        |        |        |        |        |        |        |
|----------------------|--------|--------|--------|--------|--------|--------|--------|--------|--------|--------|--------|--------|
| Infections           | 0.057  | 0.013  | -0.057 | -0.013 | 0.030  | 0.006  | -0.030 | -0.006 | 0.073  | 0.019  | -0.073 | -0.019 |
| Kidney failure       | 0.043  | 0.007  | -0.043 | -0.007 | 0.039  | 0.006  | -0.039 | -0.006 | 0.038  | 0.008  | -0.038 | -0.008 |
| Lung disease         | 0.059  | 0.004  | -0.059 | -0.004 | 0.029  | -0.001 | -0.029 | 0.001  | 0.062  | 0.007  | -0.062 | -0.007 |
| Stroke               | 0.100  | 0.007  | -0.100 | -0.007 | 0.094  | 0.006  | -0.094 | -0.006 | 0.078  | 0.005  | -0.078 | -0.005 |
| Joint surgery        | -0.016 | 0.010  | 0.016  | -0.010 | -0.118 | 0.005  | 0.118  | -0.005 | 0.106  | 0.013  | -0.106 | -0.013 |
| VTE                  | 0.045  | 0.008  | -0.045 | -0.008 | 0.041  | 0.007  | -0.041 | -0.007 | 0.033  | 0.002  | -0.033 | -0.002 |
| N previous biologics |        |        |        |        |        |        |        |        |        |        |        |        |
| 0                    | 0.721  | 0.040  | -0.721 | -0.040 | 0.819  | 0.045  | -0.819 | -0.045 | 0.574  | 0.036  | -0.574 | -0.036 |
| 1-2                  | -0.620 | -0.039 | 0.620  | 0.039  | -0.686 | -0.040 | 0.686  | 0.040  | -0.518 | -0.039 | 0.518  | 0.039  |
| 3+                   | -0.292 | -0.007 | 0.292  | 0.007  | -0.365 | -0.016 | 0.365  | 0.016  | -0.183 | 0.003  | 0.183  | -0.003 |
| Region               |        |        |        |        |        |        |        |        |        |        |        |        |
| North                | 0.083  | 0.006  | -0.083 | -0.006 | 0.081  | 0.002  | -0.081 | -0.002 | 0.086  | 0.010  | -0.086 | -0.010 |
| South                | 0.015  | 0.003  | -0.015 | -0.003 | 0.009  | 0.003  | -0.009 | -0.003 | 0.021  | -0.001 | -0.021 | 0.001  |
| Southeast            | 0.093  | 0.014  | -0.093 | -0.014 | 0.091  | 0.020  | -0.091 | -0.020 | 0.099  | 0.006  | -0.099 | -0.006 |
| Stockholm            | -0.176 | -0.016 | 0.176  | 0.016  | -0.161 | -0.021 | 0.161  | 0.021  | -0.209 | -0.007 | 0.209  | 0.007  |
| Uppsala/<br>Örebro   | 0.012  | -0.001 | -0.012 | 0.001  | 0.021  | -0.003 | -0.021 | 0.003  | 0.007  | -0.002 | -0.007 | 0.002  |
| West                 | 0.008  | -0.002 | -0.008 | 0.002  | -0.007 | 0.003  | 0.007  | -0.003 | 0.037  | -0.003 | -0.037 | 0.003  |

**Supplementary Table 9:** Standardised mean differences from propensity score weighting for all variables included in the treatment comparison between specific DMARDs, RA only

|                          | csDMARD    |          | TNFi       |          | Abatacept  |          | Tocilizumab |          | Rituximab  |          | JAKi       |          |
|--------------------------|------------|----------|------------|----------|------------|----------|-------------|----------|------------|----------|------------|----------|
|                          | Unweighted | Weighted | Unweighted | Weighted | Unweighted | Weighted | Unweighted  | Weighted | Unweighted | Weighted | Unweighted | Weighted |
| Age                      |            |          |            |          |            |          |             |          |            |          |            |          |
| <55                      | -0.312     | -0.038   | 0.348      | 0.034    | 0.012      | 0.108    | 0.163       | 0.062    | -0.083     | -0.060   | 0.218      | 0.025    |
| 55-64                    | -0.143     | -0.001   | 0.113      | 0.003    | 0.092      | -0.051   | 0.108       | 0.051    | 0.023      | -0.010   | 0.174      | 0.018    |
| 65-69                    | -0.026     | -0.003   | 0.006      | 0.004    | 0.042      | -0.005   | 0.022       | -0.040   | 0.056      | 0.022    | 0.010      | -0.002   |
| 70-74                    | 0.065      | 0.005    | -0.073     | 0.008    | 0.003      | -0.062   | -0.016      | -0.035   | 0.055      | 0.012    | -0.119     | -0.020   |
| 75-79                    | 0.148      | 0.003    | -0.161     | -0.012   | -0.006     | -0.011   | -0.086      | 0.028    | 0.025      | 0.022    | -0.098     | 0.007    |
| 80-84                    | 0.213      | 0.013    | -0.198     | -0.023   | -0.125     | 0.034    | -0.128      | 0.001    | -0.012     | 0.011    | -0.153     | -0.007   |
| 85+                      | 0.268      | 0.046    | -0.236     | -0.038   | -0.092     | -0.023   | -0.208      | -0.132   | -0.091     | 0.027    | -0.187     | -0.045   |
| bDMARD previous 180 days | -0.399     | -0.077   | 0.106      | 0.048    | 0.642      | 0.076    | 0.680       | 0.096    | 0.346      | 0.058    | 0.663      | 0.064    |
| Civil status             | 0.017      | 0.001    | -0.027     | -0.017   | -0.037     | -0.028   | -0.007      | -0.030   | 0.035      | 0.079    | 0.017      | 0.027    |
| Country of birth         |            |          |            |          |            |          |             |          |            |          |            |          |
| Sweden                   | 0.031      | 0.009    | -0.001     | 0.007    | 0.020      | -0.047   | -0.007      | 0.006    | -0.098     | 0.001    | -0.083     | -0.071   |
| Europe                   | -0.012     | -0.008   | -0.004     | -0.009   | -0.022     | 0.068    | -0.029      | -0.065   | 0.071      | 0.029    | 0.037      | 0.050    |
| Rest of world            | -0.035     | -0.004   | 0.006      | 0.001    | -0.003     | -0.015   | 0.049       | 0.078    | 0.063      | -0.040   | 0.085      | 0.048    |
| DAS28                    |            |          |            |          |            |          |             |          |            |          |            |          |
| Remission                | -0.143     | -0.020   | 0.125      | 0.014    | -0.062     | 0.023    | 0.280       | 0.020    | 0.146      | 0.029    | -0.066     | -0.020   |
| Low                      | -0.084     | -0.011   | 0.048      | 0.014    | 0.140      | 0.057    | -0.081      | -0.036   | 0.137      | -0.007   | 0.043      | -0.024   |
| Moderate                 | -0.193     | -0.014   | 0.098      | -0.005   | 0.216      | 0.027    | -0.087      | -0.010   | 0.234      | 0.050    | 0.322      | 0.044    |
| High                     | -0.132     | -0.008   | 0.009      | -0.007   | 0.214      | -0.010   | 0.132       | 0.012    | 0.164      | 0.037    | 0.356      | 0.045    |
| Missing                  | 0.312      | 0.032    | -0.186     | -0.013   | -0.217     | -0.061   | -0.162      | 0.005    | -0.376     | -0.061   | -0.272     | -0.013   |
| Disease duration         |            |          |            |          |            |          |             |          |            |          |            |          |
| <2 years                 | 0.141      | -0.023   | -0.062     | 0.020    | -0.129     | 0.105    | -0.176      | -0.050   | -0.252     | -0.076   | -0.027     | 0.110    |
| 2-4 years                | 0.154      | 0.010    | -0.080     | -0.014   | -0.080     | 0.029    | -0.135      | -0.018   | -0.241     | -0.020   | -0.108     | 0.029    |

|                                   |        |        |        |        |        |        |        |        |        |        |        |        |
|-----------------------------------|--------|--------|--------|--------|--------|--------|--------|--------|--------|--------|--------|--------|
| 5-9 years                         | 0.069  | 0.004  | -0.037 | -0.012 | -0.086 | 0.002  | 0.008  | 0.024  | -0.094 | 0.025  | -0.062 | -0.014 |
| 10+ years                         | -0.252 | 0.003  | 0.125  | 0.009  | 0.205  | -0.081 | 0.190  | 0.021  | 0.399  | 0.035  | 0.149  | -0.071 |
| Education                         |        |        |        |        |        |        |        |        |        |        |        |        |
| <9 years                          | 0.239  | 0.025  | -0.208 | -0.021 | -0.087 | -0.049 | -0.175 | -0.038 | -0.082 | -0.014 | -0.178 | 0.029  |
| 9-12 years                        | -0.015 | -0.006 | -0.011 | 0.009  | 0.010  | 0.032  | 0.062  | 0.007  | 0.056  | -0.014 | 0.032  | -0.022 |
| 12+ years                         | -0.167 | -0.013 | 0.171  | 0.006  | 0.056  | 0.002  | 0.067  | 0.022  | 0.002  | 0.026  | 0.101  | 0.002  |
| Female                            | -0.120 | -0.024 | 0.053  | 0.005  | 0.155  | 0.067  | 0.141  | -0.001 | 0.088  | 0.030  | 0.183  | 0.044  |
| Hospital days (previous 10 years) |        |        |        |        |        |        |        |        |        |        |        |        |
| 0                                 | 0.050  | 0.000  | 0.090  | 0.025  | -0.209 | -0.049 | -0.111 | -0.039 | -0.293 | -0.107 | -0.166 | 0.080  |
| 1-6                               | -0.066 | -0.013 | 0.071  | 0.008  | 0.017  | 0.029  | 0.011  | -0.010 | 0.005  | 0.007  | 0.032  | 0.020  |
| 7+                                | 0.011  | 0.012  | -0.160 | -0.033 | 0.199  | 0.023  | 0.104  | 0.049  | 0.298  | 0.104  | 0.140  | -0.101 |
| Hospital days (previous year)     |        |        |        |        |        |        |        |        |        |        |        |        |
| 0                                 | -0.054 | -0.002 | 0.128  | 0.026  | -0.087 | -0.052 | 0.081  | -0.011 | -0.157 | -0.096 | -0.088 | 0.055  |
| 1-3                               | -0.001 | -0.013 | -0.034 | -0.002 | 0.057  | -0.018 | -0.026 | 0.048  | 0.090  | 0.060  | 0.030  | -0.001 |
| 4+                                | 0.066  | 0.012  | -0.128 | -0.031 | 0.060  | 0.077  | -0.077 | -0.023 | 0.119  | 0.069  | 0.083  | -0.066 |
| Comorbidities                     |        |        |        |        |        |        |        |        |        |        |        |        |
| Cancer                            | 0.150  | 0.013  | -0.162 | -0.011 | -0.068 | 0.014  | -0.140 | -0.049 | 0.073  | 0.037  | -0.088 | -0.072 |
| Diabetes                          | 0.077  | 0.012  | -0.111 | -0.020 | 0.071  | 0.019  | -0.055 | 0.044  | 0.060  | 0.032  | -0.024 | -0.066 |
| Heart failure                     | 0.108  | 0.020  | -0.138 | -0.024 | 0.055  | 0.029  | -0.077 | -0.007 | 0.053  | 0.023  | -0.053 | -0.067 |
| IHD                               | 0.091  | 0.012  | -0.117 | -0.013 | 0.071  | 0.034  | -0.128 | 0.021  | 0.069  | 0.035  | -0.050 | -0.109 |
| Infections                        | 0.030  | 0.008  | -0.104 | -0.027 | 0.117  | 0.040  | -0.053 | 0.037  | 0.154  | 0.061  | 0.082  | -0.050 |
| Kidney failure                    | 0.039  | -0.002 | -0.064 | -0.027 | 0.036  | 0.036  | -0.001 | 0.148  | 0.059  | 0.089  | -0.035 | -0.096 |
| Lung disease                      | 0.029  | -0.016 | -0.145 | -0.027 | 0.219  | 0.129  | -0.006 | -0.004 | 0.251  | 0.114  | 0.054  | -0.008 |
| Stroke                            | 0.094  | 0.008  | -0.090 | -0.007 | 0.001  | -0.008 | -0.071 | -0.005 | 0.002  | 0.054  | -0.112 | -0.089 |
| Joint surgery                     | -0.118 | 0.009  | 0.013  | -0.011 | 0.191  | -0.027 | 0.153  | -0.012 | 0.214  | 0.016  | 0.167  | 0.009  |
| VTE                               | 0.041  | 0.011  | -0.063 | -0.012 | 0.010  | -0.019 | -0.043 | -0.010 | 0.037  | 0.007  | 0.037  | 0.000  |

|                      |        |        |        |        |        |        |        |        |        |        |        |        |
|----------------------|--------|--------|--------|--------|--------|--------|--------|--------|--------|--------|--------|--------|
| N previous biologics |        |        |        |        |        |        |        |        |        |        |        |        |
| 0                    | 0.819  | 0.052  | -0.248 | -0.020 | -1.168 | -0.064 | -1.161 | -0.085 | -0.814 | -0.051 | -1.319 | -0.072 |
| 1-2                  | -0.686 | -0.043 | 0.294  | 0.017  | 0.925  | 0.072  | 0.931  | 0.068  | 0.676  | 0.037  | 0.688  | 0.050  |
| 3+                   | -0.365 | -0.024 | -0.040 | 0.009  | 0.610  | -0.003 | 0.587  | 0.043  | 0.372  | 0.033  | 1.309  | 0.050  |
| Region               |        |        |        |        |        |        |        |        |        |        |        |        |
| North                | 0.081  | 0.007  | -0.077 | 0.006  | 0.068  | 0.016  | -0.146 | -0.131 | -0.023 | 0.005  | -0.062 | -0.017 |
| South                | 0.009  | 0.013  | 0.027  | 0.006  | 0.043  | -0.084 | 0.138  | 0.087  | -0.223 | -0.093 | -0.011 | 0.023  |
| Southeast            | 0.091  | 0.031  | -0.049 | -0.004 | -0.109 | -0.066 | -0.113 | -0.086 | -0.117 | -0.017 | -0.008 | -0.068 |
| Stockholm            | -0.161 | -0.038 | 0.093  | -0.003 | 0.087  | 0.052  | -0.011 | 0.050  | 0.309  | 0.060  | 0.074  | 0.134  |
| Uppsala/<br>Örebro   | 0.021  | -0.011 | -0.043 | 0.002  | -0.026 | 0.020  | 0.063  | 0.018  | 0.054  | 0.012  | -0.007 | 0.024  |
| West                 | -0.007 | 0.005  | 0.026  | -0.007 | -0.069 | 0.064  | 0.009  | 0.014  | -0.024 | 0.037  | -0.004 | -0.124 |

**Supplementary Table 10.** Standardised mean differences from propensity score weighting for all variables included in the comparison between specific DMARDs, all inflammatory joint diseases

|                             | csDMARD    |          | TNFi       |          | Abatacept  |          | Tocilizumab |          | Rituximab  |          | JAKi       |          |
|-----------------------------|------------|----------|------------|----------|------------|----------|-------------|----------|------------|----------|------------|----------|
|                             | Unweighted | Weighted | Unweighted | Weighted | Unweighted | Weighted | Unweighted  | Weighted | Unweighted | Weighted | Unweighted | Weighted |
| Age                         |            |          |            |          |            |          |             |          |            |          |            |          |
| <55                         | -0.312     | -0.038   | 0.348      | 0.034    | 0.012      | 0.108    | 0.163       | 0.062    | -0.083     | -0.060   | 0.218      | 0.025    |
| 55-64                       | -0.143     | -0.001   | 0.113      | 0.003    | 0.092      | -0.051   | 0.108       | 0.051    | 0.023      | -0.010   | 0.174      | 0.018    |
| 65-69                       | -0.026     | -0.003   | 0.006      | 0.004    | 0.042      | -0.005   | 0.022       | -0.040   | 0.056      | 0.022    | 0.010      | -0.002   |
| 70-74                       | 0.065      | 0.005    | -0.073     | 0.008    | 0.003      | -0.062   | -0.016      | -0.035   | 0.055      | 0.012    | -0.119     | -0.020   |
| 75-79                       | 0.148      | 0.003    | -0.161     | -0.012   | -0.006     | -0.011   | -0.086      | 0.028    | 0.025      | 0.022    | -0.098     | 0.007    |
| 80-84                       | 0.213      | 0.013    | -0.198     | -0.023   | -0.125     | 0.034    | -0.128      | 0.001    | -0.012     | 0.011    | -0.153     | -0.007   |
| 85+                         | 0.268      | 0.046    | -0.236     | -0.038   | -0.092     | -0.023   | -0.208      | -0.132   | -0.091     | 0.027    | -0.187     | -0.045   |
| bDMARD<br>previous 180 days | -0.399     | -0.077   | 0.106      | 0.048    | 0.642      | 0.076    | 0.680       | 0.096    | 0.346      | 0.058    | 0.663      | 0.064    |
| Civil status                | 0.017      | 0.001    | -0.027     | -0.017   | -0.037     | -0.028   | -0.007      | -0.030   | 0.035      | 0.079    | 0.017      | 0.027    |
| Country of birth            |            |          |            |          |            |          |             |          |            |          |            |          |
| Sweden                      | 0.031      | 0.009    | -0.001     | 0.007    | 0.020      | -0.047   | -0.007      | 0.006    | -0.098     | 0.001    | -0.083     | -0.071   |
| Europe                      | -0.012     | -0.008   | -0.004     | -0.009   | -0.022     | 0.068    | -0.029      | -0.065   | 0.071      | 0.029    | 0.037      | 0.050    |
| Rest of world               | -0.035     | -0.004   | 0.006      | 0.001    | -0.003     | -0.015   | 0.049       | 0.078    | 0.063      | -0.040   | 0.085      | 0.048    |
| DAS28                       |            |          |            |          |            |          |             |          |            |          |            |          |
| Remission                   | -0.143     | -0.020   | 0.125      | 0.014    | -0.062     | 0.023    | 0.280       | 0.020    | 0.146      | 0.029    | -0.066     | -0.020   |
| Low                         | -0.084     | -0.011   | 0.048      | 0.014    | 0.140      | 0.057    | -0.081      | -0.036   | 0.137      | -0.007   | 0.043      | -0.024   |
| Moderate                    | -0.193     | -0.014   | 0.098      | -0.005   | 0.216      | 0.027    | -0.087      | -0.010   | 0.234      | 0.050    | 0.322      | 0.044    |
| High                        | -0.132     | -0.008   | 0.009      | -0.007   | 0.214      | -0.010   | 0.132       | 0.012    | 0.164      | 0.037    | 0.356      | 0.045    |
| Missing                     | 0.312      | 0.032    | -0.186     | -0.013   | -0.217     | -0.061   | -0.162      | 0.005    | -0.376     | -0.061   | -0.272     | -0.013   |
| Disease duration            |            |          |            |          |            |          |             |          |            |          |            |          |
| <2 years                    | 0.141      | -0.023   | -0.062     | 0.020    | -0.129     | 0.105    | -0.176      | -0.050   | -0.252     | -0.076   | -0.027     | 0.110    |
| 2-4 years                   | 0.154      | 0.010    | -0.080     | -0.014   | -0.080     | 0.029    | -0.135      | -0.018   | -0.241     | -0.020   | -0.108     | 0.029    |

|                                   |        |        |        |        |        |        |        |        |        |        |        |        |
|-----------------------------------|--------|--------|--------|--------|--------|--------|--------|--------|--------|--------|--------|--------|
| 5-9 years                         | 0.069  | 0.004  | -0.037 | -0.012 | -0.086 | 0.002  | 0.008  | 0.024  | -0.094 | 0.025  | -0.062 | -0.014 |
| 10+ years                         | -0.252 | 0.003  | 0.125  | 0.009  | 0.205  | -0.081 | 0.190  | 0.021  | 0.399  | 0.035  | 0.149  | -0.071 |
| Education                         |        |        |        |        |        |        |        |        |        |        |        |        |
| <9 years                          | 0.239  | 0.025  | -0.208 | -0.021 | -0.087 | -0.049 | -0.175 | -0.038 | -0.082 | -0.014 | -0.178 | 0.029  |
| 9-12 years                        | -0.015 | -0.006 | -0.011 | 0.009  | 0.010  | 0.032  | 0.062  | 0.007  | 0.056  | -0.014 | 0.032  | -0.022 |
| 12+ years                         | -0.167 | -0.013 | 0.171  | 0.006  | 0.056  | 0.002  | 0.067  | 0.022  | 0.002  | 0.026  | 0.101  | 0.002  |
| Female                            | -0.120 | -0.024 | 0.053  | 0.005  | 0.155  | 0.067  | 0.141  | -0.001 | 0.088  | 0.030  | 0.183  | 0.044  |
| Hospital days (previous 10 years) |        |        |        |        |        |        |        |        |        |        |        |        |
| 0                                 | 0.050  | 0.000  | 0.090  | 0.025  | -0.209 | -0.049 | -0.111 | -0.039 | -0.293 | -0.107 | -0.166 | 0.080  |
| 1-6                               | -0.066 | -0.013 | 0.071  | 0.008  | 0.017  | 0.029  | 0.011  | -0.010 | 0.005  | 0.007  | 0.032  | 0.020  |
| 7+                                | 0.011  | 0.012  | -0.160 | -0.033 | 0.199  | 0.023  | 0.104  | 0.049  | 0.298  | 0.104  | 0.140  | -0.101 |
| Hospital days (previous year)     |        |        |        |        |        |        |        |        |        |        |        |        |
| 0                                 | -0.054 | -0.002 | 0.128  | 0.026  | -0.087 | -0.052 | 0.081  | -0.011 | -0.157 | -0.096 | -0.088 | 0.055  |
| 1-3                               | -0.001 | -0.013 | -0.034 | -0.002 | 0.057  | -0.018 | -0.026 | 0.048  | 0.090  | 0.060  | 0.030  | -0.001 |
| 4+                                | 0.066  | 0.012  | -0.128 | -0.031 | 0.060  | 0.077  | -0.077 | -0.023 | 0.119  | 0.069  | 0.083  | -0.066 |
| Comorbidities                     |        |        |        |        |        |        |        |        |        |        |        |        |
| Cancer                            | 0.150  | 0.013  | -0.162 | -0.011 | -0.068 | 0.014  | -0.140 | -0.049 | 0.073  | 0.037  | -0.088 | -0.072 |
| Diabetes                          | 0.077  | 0.012  | -0.111 | -0.020 | 0.071  | 0.019  | -0.055 | 0.044  | 0.060  | 0.032  | -0.024 | -0.066 |
| Heart failure                     | 0.108  | 0.020  | -0.138 | -0.024 | 0.055  | 0.029  | -0.077 | -0.007 | 0.053  | 0.023  | -0.053 | -0.067 |
| IHD                               | 0.091  | 0.012  | -0.117 | -0.013 | 0.071  | 0.034  | -0.128 | 0.021  | 0.069  | 0.035  | -0.050 | -0.109 |
| Infections                        | 0.030  | 0.008  | -0.104 | -0.027 | 0.117  | 0.040  | -0.053 | 0.037  | 0.154  | 0.061  | 0.082  | -0.050 |
| Kidney failure                    | 0.039  | -0.002 | -0.064 | -0.027 | 0.036  | 0.036  | -0.001 | 0.148  | 0.059  | 0.089  | -0.035 | -0.096 |
| Lung disease                      | 0.029  | -0.016 | -0.145 | -0.027 | 0.219  | 0.129  | -0.006 | -0.004 | 0.251  | 0.114  | 0.054  | -0.008 |
| Stroke                            | 0.094  | 0.008  | -0.090 | -0.007 | 0.001  | -0.008 | -0.071 | -0.005 | 0.002  | 0.054  | -0.112 | -0.089 |
| Joint surgery                     | -0.118 | 0.009  | 0.013  | -0.011 | 0.191  | -0.027 | 0.153  | -0.012 | 0.214  | 0.016  | 0.167  | 0.009  |
| VTE                               | 0.041  | 0.011  | -0.063 | -0.012 | 0.010  | -0.019 | -0.043 | -0.010 | 0.037  | 0.007  | 0.037  | 0.000  |

|                      |        |        |        |        |        |        |        |        |        |        |        |        |
|----------------------|--------|--------|--------|--------|--------|--------|--------|--------|--------|--------|--------|--------|
| N previous biologics |        |        |        |        |        |        |        |        |        |        |        |        |
| 0                    | 0.819  | 0.052  | -0.248 | -0.020 | -1.168 | -0.064 | -1.161 | -0.085 | -0.814 | -0.051 | -1.319 | -0.072 |
| 1-2                  | -0.686 | -0.043 | 0.294  | 0.017  | 0.925  | 0.072  | 0.931  | 0.068  | 0.676  | 0.037  | 0.688  | 0.050  |
| 3+                   | -0.365 | -0.024 | -0.040 | 0.009  | 0.610  | -0.003 | 0.587  | 0.043  | 0.372  | 0.033  | 1.309  | 0.050  |
| Region               |        |        |        |        |        |        |        |        |        |        |        |        |
| North                | 0.081  | 0.007  | -0.077 | 0.006  | 0.068  | 0.016  | -0.146 | -0.131 | -0.023 | 0.005  | -0.062 | -0.017 |
| South                | 0.009  | 0.013  | 0.027  | 0.006  | 0.043  | -0.084 | 0.138  | 0.087  | -0.223 | -0.093 | -0.011 | 0.023  |
| Southeast            | 0.091  | 0.031  | -0.049 | -0.004 | -0.109 | -0.066 | -0.113 | -0.086 | -0.117 | -0.017 | -0.008 | -0.068 |
| Stockholm            | -0.161 | -0.038 | 0.093  | -0.003 | 0.087  | 0.052  | -0.011 | 0.050  | 0.309  | 0.060  | 0.074  | 0.134  |
| Uppsala/<br>Örebro   | 0.021  | -0.011 | -0.043 | 0.002  | -0.026 | 0.020  | 0.063  | 0.018  | 0.054  | 0.012  | -0.007 | 0.024  |
| West                 | -0.007 | 0.005  | 0.026  | -0.007 | -0.069 | 0.064  | 0.009  | 0.014  | -0.024 | 0.037  | -0.004 | -0.124 |

**Supplementary Figure 1.** Total number of deaths per day due to COVID-19 in Sweden, reported by The Public Health Agency of Sweden (Folkhälsomyndigheten, <https://experience.arcgis.com/experience/09f821667ce64bf7be6f9f87457ed9aa>, accessed 9<sup>th</sup> December 2020). Note that here, deaths due to COVID-19 are defined as any death that occurs within 30 days after a confirmed COVID-19 infection.

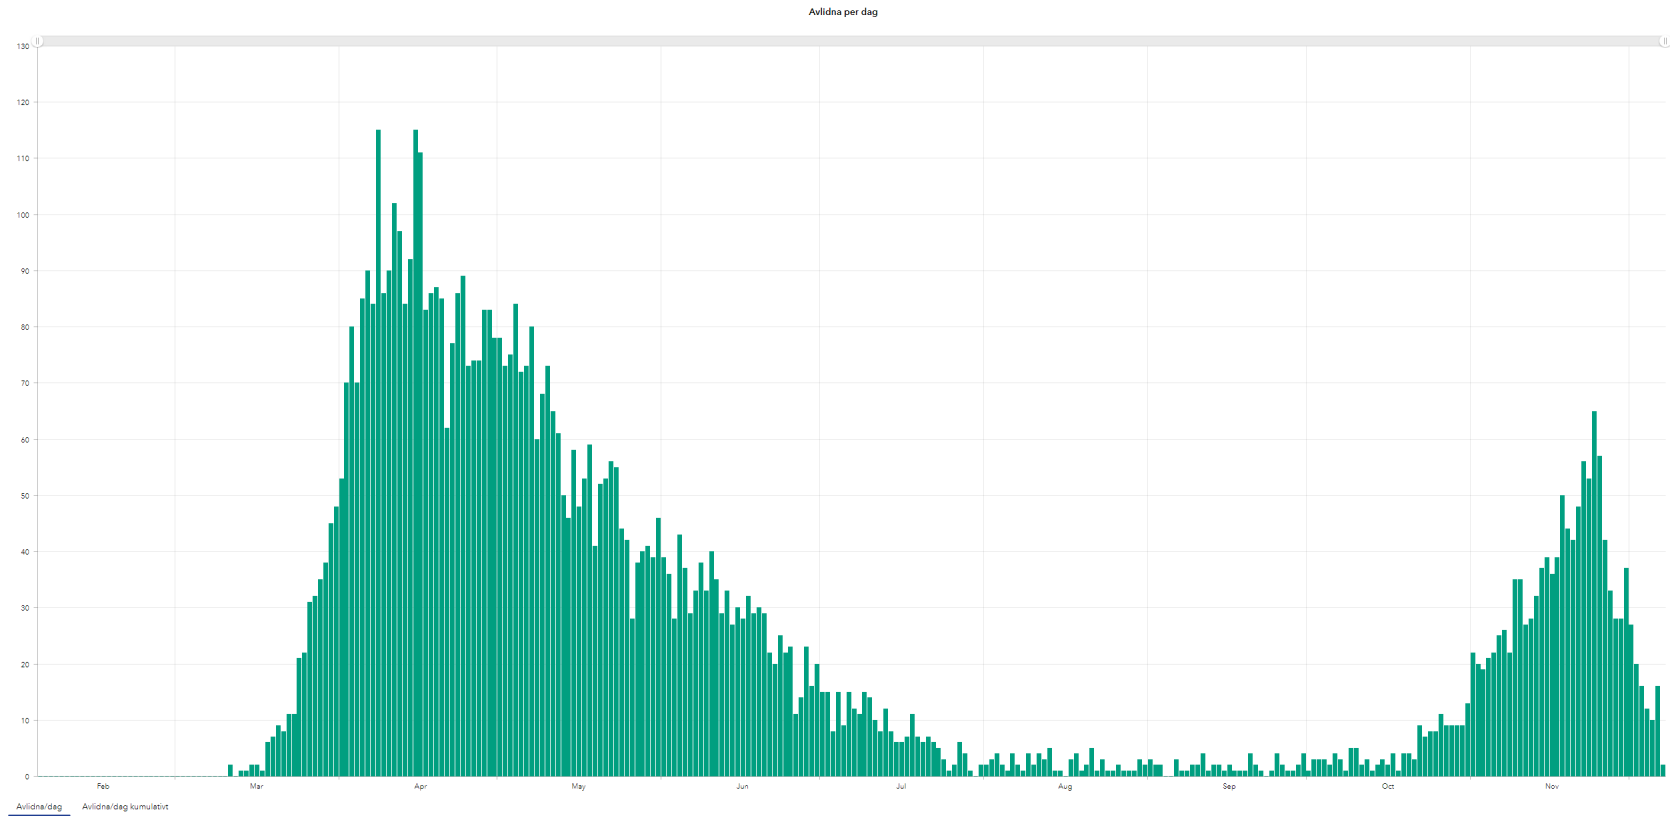



**Supplementary Figure 2.** Standardised mean differences from propensity score weighting for all variables included in the comparison between specific csDMARDs and bDMARDs, for all inflammatory joint diseases (IJD), RA, and other IJD.

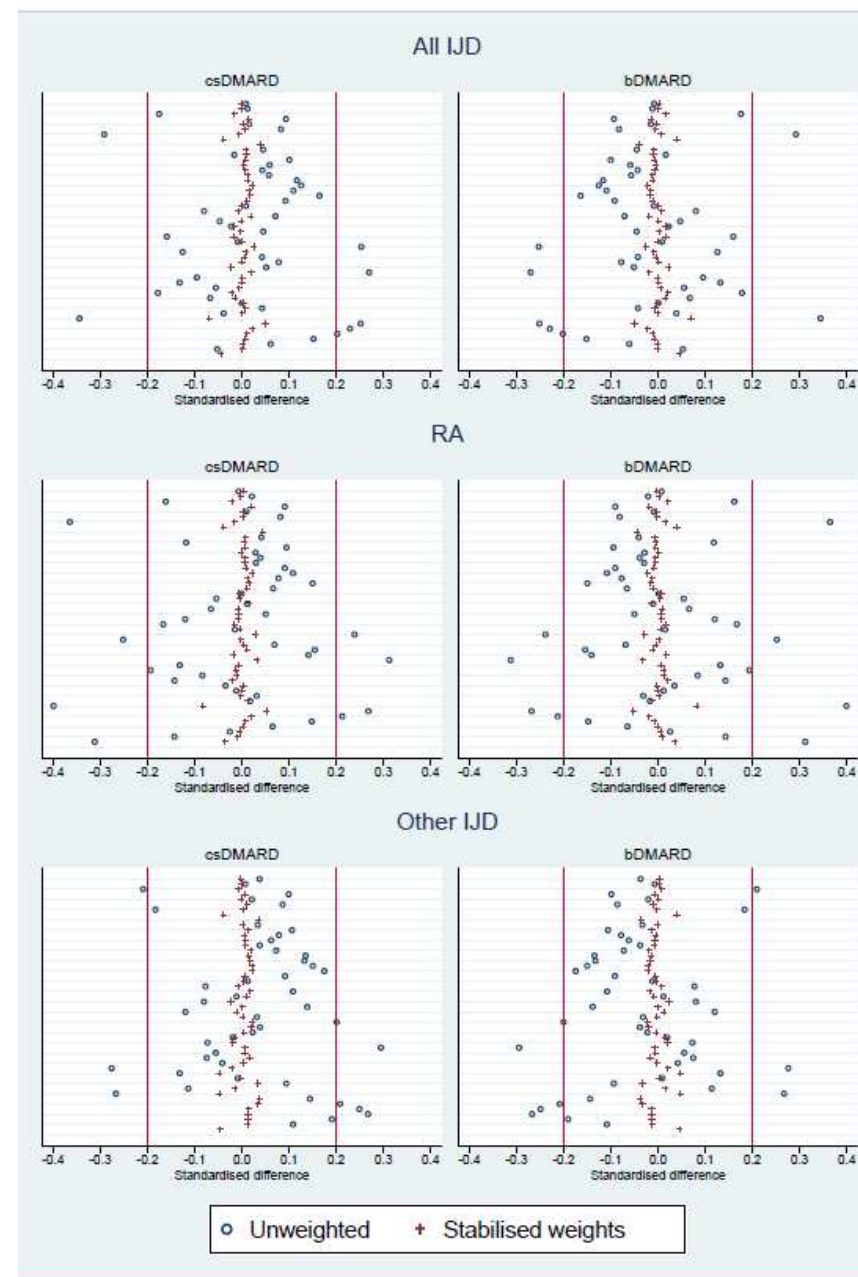

**Supplementary Figure 3.** Standardised mean differences from propensity score weighting for all variables included in the comparison between

DMARDs cohorts, for all patients with inflammatory joint diseases

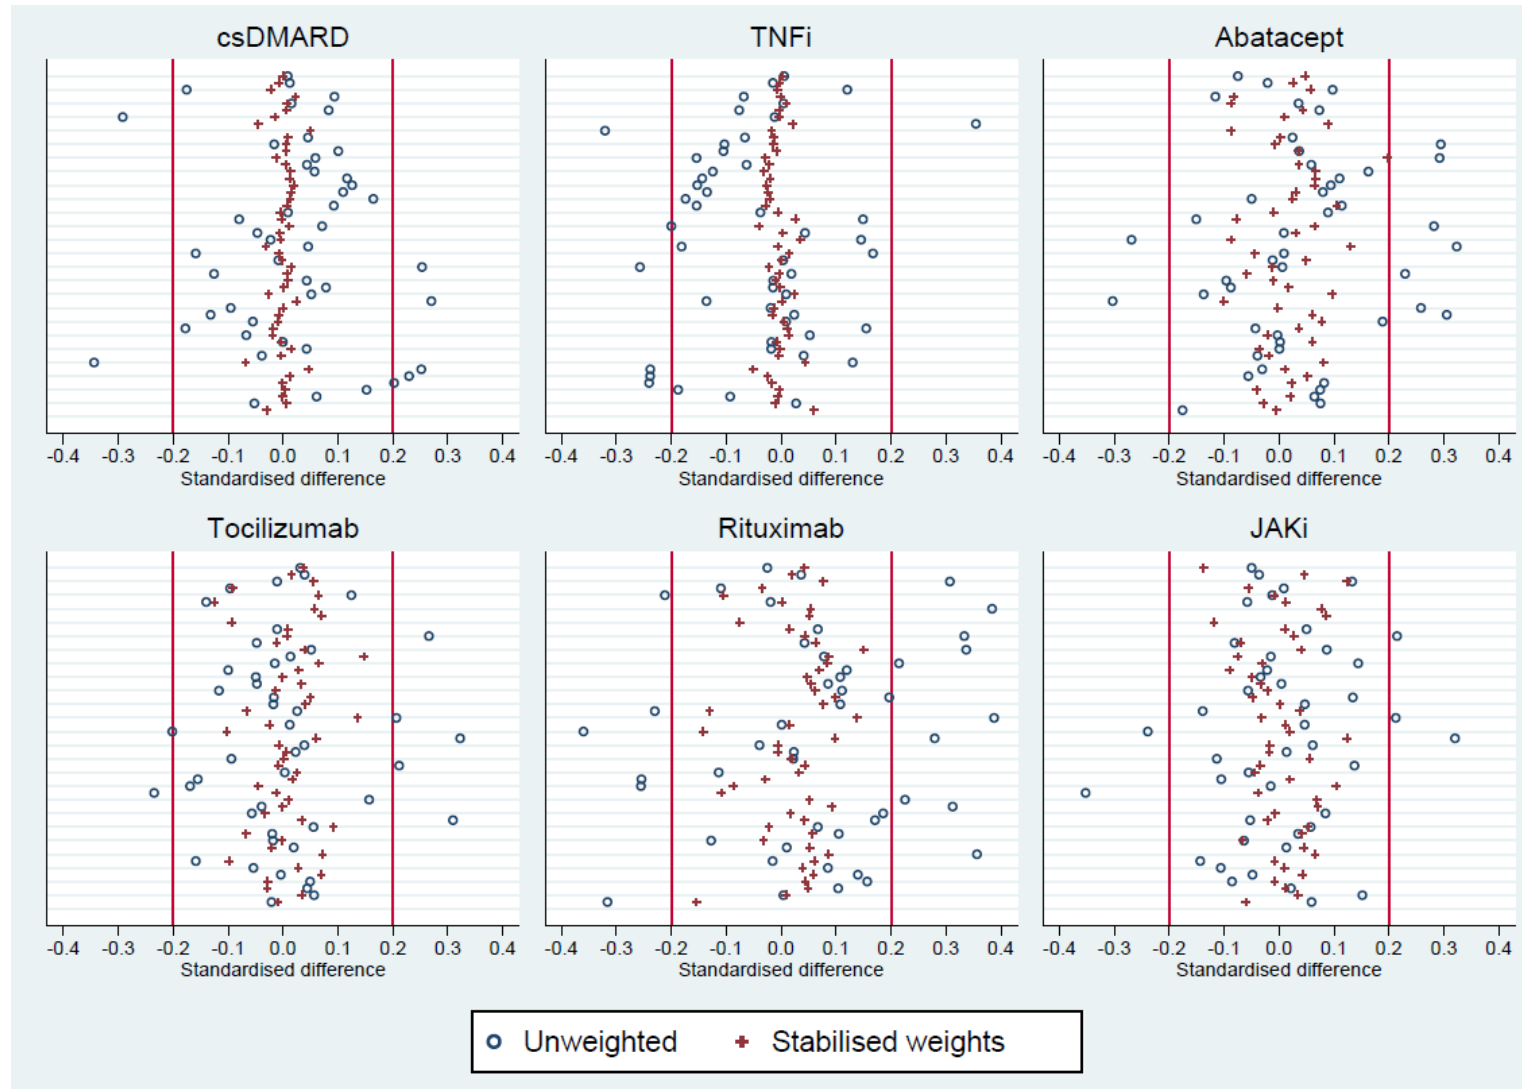

**Supplementary Figure 4.** Standardised mean differences from propensity score weighting for all variables included in the comparison between DMARDs cohorts, for RA patients

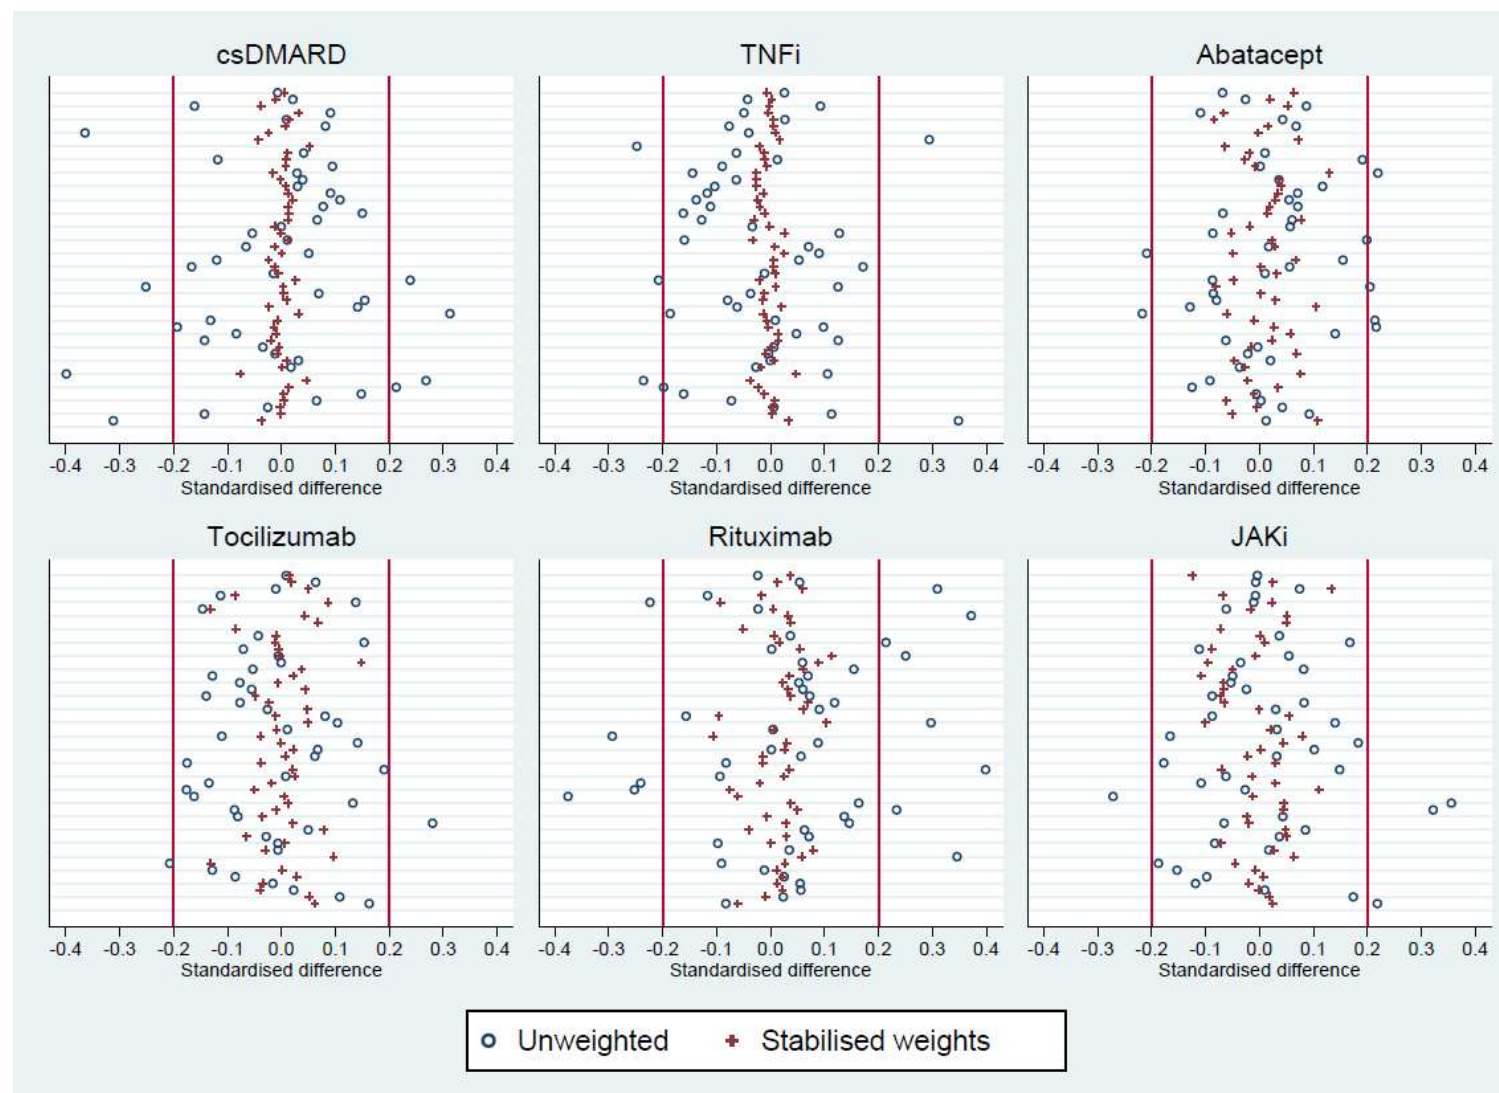

Supplement: inline-supplementary-material-1 [file inline-supplementary-material-1.pdf]
